# Supplementary material for: Plasmacytoid dendritic cells proliferation associated with acute myeloid leukemia: phenotype profile and mutation landscape
Source: PubMed Central journal article supplement — Haematologica. 2020 Oct 13;106(12):3056–66. doi: 10.3324/haematol.2020.253740 (PMC8634182; doi:10.3324/haematol.2020.253740), 2020-10-13
Supplement: 2020_253740_ZALMAI_SUPPL.pdf [file 2020_253740_ZALMAI_SUPPL.pdf]

## Plasmacytoid dendritic cells proliferation associated with acute myeloid leukemia: phenotype profile and mutation landscape

Loria Zalmai,<sup>1</sup> Pierre-Julien Viailly,<sup>2</sup> Sabeha Biichle,<sup>3</sup> Meyling Cheok,<sup>4</sup> Lou Soret,<sup>3</sup> Fanny Angelot-Delettre,<sup>3</sup> Tony Petrella,<sup>5</sup> Marie-Agnès Collonge-Rame,<sup>6</sup> Estelle Seilles,<sup>3</sup> Sandrine Geffroy,<sup>4,7</sup> Eric Deconinck,<sup>8</sup> Etienne Daguindau,<sup>8</sup> Sabrina Bouyer,<sup>9</sup> Elodie Dindinaud,<sup>9</sup> Victor Baunin,<sup>10</sup> Magali Le Garff-Tavernier,<sup>11</sup> Damien Roos-Weil,<sup>12</sup> Oriane Wagner-Ballon,<sup>13</sup> Véronique Salaun,<sup>14</sup> Jean Feuillard,<sup>15</sup> Sophie Brun,<sup>16</sup> Bernard Drenou,<sup>17</sup> Caroline Mayeur-Rousse,<sup>18</sup> Patricia Okamba,<sup>19</sup> Véronique Dorvaux,<sup>20</sup> Michel Tichionni,<sup>21</sup> Johann Rose,<sup>22</sup> Marie Thérèse Rubio,<sup>23</sup> Marie Christine Jacob,<sup>24</sup> Victoria Raggiueanu,<sup>25</sup> Claude Preudhomme,<sup>4,7</sup> Philippe Saas,<sup>3</sup> Christophe Ferrand,<sup>3</sup> Olivier Adotevi,<sup>3</sup> Christophe Roumier,<sup>4,7</sup> Fabrice Jardin,<sup>2</sup> Francine Garnache-Ottou<sup>3</sup> and Florian Renosi<sup>3</sup>

<sup>1</sup>Service d'Hématologie Biologique, Hôpital Cochin, Assistance Publique-Hôpitaux de Paris (AP-HP), Paris, France; <sup>2</sup>INSERM U1245, Centre Henri Becquerel, Rouen, France; <sup>3</sup>Université Bourgogne Franche-Comté, INSERM, EFS BFC, UMR1098, Interactions Hôte-Greffon-Tumeur/Ingénierie Cellulaire et Génique, Besançon, France; <sup>4</sup>INSERM U837, CHRU Lille, IRCL Laboratoire d'Hématologie, Centre de Biologie Pathologie, Lille, France; <sup>5</sup>Department of Pathology, University of Montréal, Hôpital Maisonneuve-Rosemont, Montréal, Québec, Canada; <sup>6</sup>Laboratoire de Génétique Biologie, CHU Besançon, Besançon, France; <sup>7</sup>Laboratoire d'Hématologie A, Centre de Biologie Pathologie, Boulevard du Pr Leclercq, Lille, France; <sup>8</sup>Service Hématologie, CHU Besançon, Besançon, France; <sup>9</sup>Service d'Hématologie Biologique, CHU La Milétrie, Poitiers, France; <sup>10</sup>Laboratoire du Groupe Hospitalier de La Rochelle-Ré-Aunis, CH de La Rochelle, La Rochelle, France; <sup>11</sup>Laboratoire d'Hématologie, Hôpital Pitié-Salpêtrière, Assistance Publique-Hôpitaux de Paris (AP-HP), Paris, France; <sup>12</sup>Service d'Hématologie Clinique, Sorbonne Université, Hôpital Pitié-Salpêtrière, Assistance Publique-Hôpitaux de Paris (AP-HP), Paris, France; <sup>13</sup>Département d'Hématologie biologique, Hôpitaux Universitaires Henri Mondor, Assistance Publique-Hôpitaux de Paris (AP-HP), Créteil, France; <sup>14</sup>Laboratoire d'Hématologie, CHU de Caen Normandie, Normandie Université, UNICAEN, Caen, France; <sup>15</sup>Laboratoire d'Hématologie, CHU Dupuytren, Limoges, France; <sup>16</sup>Laboratoire d'Hématologie et Consultations d'Hématologie Biologique, Hôpital Universitaire Carémeau, Nîmes, France; <sup>17</sup>Service d'Hématologie, Groupe Hospitalier de la région Mulhouse Sud Alsace, Mulhouse, France; <sup>18</sup>Laboratoire d'Hématologie, CHRU Strasbourg, Hôpital de Hautepierre, Strasbourg, France; <sup>19</sup>Laboratoire d'Hématologie et Auto-immunité, Hôpital de Mercy, CHR de Metz-Thionville, France; <sup>20</sup>Service d'Hématologie de l'Hôpital de Mercy, CHR de Metz-Thionville, France; <sup>21</sup>Laboratoire d'Hématologie de l'Hôpital Pasteur, Nice, France; <sup>22</sup>Laboratoire d'hématologie, CH du Mans, Le Mans, France; <sup>23</sup>Service Hématologie, CNRS UMR7365, Biopôle Université de Lorraine, CHRU Nancy, Vandœuvre-lès-Nancy, France; <sup>24</sup>Laboratoire d'Immunologie, CHU Grenoble, La Tronche, France and <sup>25</sup>Service de Biologie Médicale, Centre Hospitalier de Versailles A. Mignot, Le Chesnay, France

©2021 Ferrata Storti Foundation. This is an open-access paper. doi:10.3324/haematol.2020.253740

Received: March 26, 2020.

Accepted: September 24, 2020.

Pre-published: October 13, 2020.

Correspondence: FRANCINE GARNACHE-OTTOU - francine.garnache@efs.sante.fr

## Supplemental methods

**PATIENT SAMPLES:** Normal BM aspiration performed for peripheral thrombopenia/research of metastatic infiltration were performed on sternal puncture. After BM examination, no qualitative or quantitative abnormalities were noticed, and cytologists concluded to physiological hematopoiesis.

**CELL LABELLING:** After 20 minutes of incubation, cells were washed twice with PBS buffer (Gibco Life technologies, Paisley, UK). The percentage of positive expression of markers was determined by a threshold obtained using matched isotypic control mAbs.

**CELL SORTING:** 30,000 to one million cells were obtained per fraction and their purity was controlled by flow cytometry. The sorted cells were frozen in dry pellets at -20°C.

### MOLECULAR BIOLOGY

After thawing the cell pellets at room temperature, the genomic DNA of each sorted fraction was extracted manually according to the manufacturer's instructions using the QIAamp® DNA Mini kit (Qiagen, Hilden, Germany) or the QIAamp® DNA Micro kit (Qiagen) for fractions below 150,000 cells. The DNA was eluted in 20-30 µL of elution buffer. Concentrations ranged from 0.58-33.86 ng/µL on a Nanodrop™ND-2000 spectrophotometer (Thermo Fisher Scientific, Wilmington, USA). After Whole Genome Amplification, the final DNA quantities obtained were about 40 µg on Nanodrop™ND-2000.

The HaloPlex<sup>HS</sup> Target Enrichment System design included 5392 amplicons, a total sequenceable design size of 244.235 kbp and a total coverage of 98.56%. In addition to genes recurrently mutated in onco-hematology, this panel included mutated genes in BPDCN (*IKZF2*, *IKZF3*, *ZEB2*, *HOXB9*, *UBE2G2*, *APC*, *MET*, *RB1*, *VHL*, *MLH1*, *RET*, *SHOC2*, *NEFH*, *HNF1A*, *SSC5D*, *SF3A2*, *SF3BA*, *PAX3*, *GNB1*, *CRIPAK*, *MAP2K1*). *NPM1* and *CEBPA* variants were screened by Sanger sequencing with a BigDye®Terminator V3.1 Cycle Sequencing kit (Thermo Fisher Scientific) and *FLT3-ITD* mutations were confirmed by fragment analysis on an ABI3500 device (Applied Biosystems, Thermo Fisher Scientific). Some other variants (*ASXL1*, *RUNX1*, *PFH6*) detected by NGS were confirmed by Sanger sequencing on a capillary sequencer SeqStudio Genetic Analyser (Applied Biosystems, Thermo Fisher Scientific).

### BIOINFORMATICS ANALYSIS

The reads were aligned with the reference genome sequence GHCh37 (hg19) using the BWA (Burrows-Wheeler Alignment) aligner. The calibration of the base scores (BSQR) and the realignment of the Indels were performed according to GATK Best Practices recommendations. Variant Calling was based on the VarScan algorithm. The

annotation of the variants was done via Generate Reports™ yielding VCF files (Variant Call Files). Finally, several filters were applied to eliminate intronic regions, synonymous mutations and polymorphisms with VAF>0.01%.

## Supplemental tables

**Table S1: Antibodies used for immunophenotype or cell sorting.** Expression was evaluated on the selected populations for immunophenotyping. Intracellular detection of TCL1 was performed after permeabilization with PFA 8% (Sigma-Aldrich, Saint-Louis, Missouri, USA) and lysis perm buffer : Triton X100 10% (Euromedex, Souffelweyersheim, France). After 20 minutes of incubation, the cells were washed twice with PBS buffer (Gibco Life technologies, Paisley, UK). Conjugated fluorochromes: phycoerythrin (PE), allophycocyanin (APC), allophycocyanin-H7 (APC-H7), phycoerythrin-cyanin-7 (PE-Cy7)

| Antigen | Conjugated fluorochrome | Clone     | Firm                    | Purpose         |
|---------|-------------------------|-----------|-------------------------|-----------------|
| CD45    | Horizon V500            | HI30      | BD Biosciences          | immunophenotype |
| CD34    | Horizon V450            | 8G12      | BD Biosciences          | immunophenotype |
| CD117   | APC                     | 104D2     | BD Pharmingen           | immunophenotype |
| HLA-DR  | FITC                    | G46-6     | BD Pharmingen           | immunophenotype |
| TdT     | FITC                    | HT-6      | Dako                    | immunophenotype |
| ILT7    | APC                     | 17G10.2   | Affymetrix eBiosciences | immunophenotype |
| CD11c   | PerCP-Cy5.5             | B-ly6     | BD Pharmingen           | immunophenotype |
| CD1c    | PE                      | L161      | Biolegend, Ozyme        | immunophenotype |
| CD141   | APC                     | AD5-14H12 | Miltenyi Biotec         | immunophenotype |
| cMPO    | FITC                    | MPO-7     | Dako                    | immunophenotype |
| CD13    | PE                      | L138      | BD Pharmingen           | immunophenotype |
| CD33    | PerCP-Cy5.5             | P67.6     | BD Pharmingen           | immunophenotype |
| CD14    | APC-H7                  | MφP9      | BD Pharmingen           | immunophenotype |
| CD64    | FITC                    | 10.1      | BD Pharmingen           | immunophenotype |
| CD15    | FITC                    | HI98      | BD Pharmingen           | immunophenotype |
| CD22    | PerCP-Cy5.5             | HIB22     | BD Pharmingen           | immunophenotype |
| CD7     | Horizon V450            | M-T701    | BD Pharmingen           | immunophenotype |
| CD5     | FITC                    | BL1a      | Beckman Coulter         | immunophenotype |
| CD56    | Horizon V450            | B156      | BD Biosciences          | immunophenotype |
| CD4     | APC-H7                  | SK3       | BD Biosciences          | immunophenotype |
| CD123   | PE-Cy7                  | 6H6       | Biolegend, Ozyme        | immunophenotype |
| CD303   | APC                     | AC144     | Miltenyi Biotec         | immunophenotype |
| CD304   | PE                      | AD5-17F6  | Miltenyi Biotec         | immunophenotype |
| cTCL1   | PE                      | eBio1-21  | Affymetrix eBiosciences | immunophenotype |
| CD45    | BV421                   | HI30      | BD Pharmingen           | cell sorting    |
| CD45    | Horizon V500            | HI30      | BD Pharmingen           | cell sorting    |
| CD3     | Horizon V500            | SK7       | BD Pharmingen           | cell sorting    |
| CD34    | APC                     | 8G12      | BD Pharmingen           | cell sorting    |
| CD123   | PE-Cy7                  | 6H6       | Biolegend, Ozyme        | cell sorting    |
| CD303   | FITC                    | 201A      | Biolegend, Ozyme        | cell sorting    |
| CD304   | FITC                    | 12C2      | Biolegend, Ozyme        | cell sorting    |
| CD1c    | PE                      | L161      | Biolegend, Ozyme        | cell sorting    |
| CD14    | APC-H7                  | MφP9      | BD Pharmingen           | cell sorting    |
| CD64    | FITC                    | 10.1      | BD Pharmingen           | cell sorting    |

SUPPLEMENTAL DOCUMENTS

Table S2: Amplicons included in the HaloPlex<sup>HS</sup> Target Enrichment System design for Illumina Sequencing

| Target ID (gene name_exon or region) | Chromosomal coordinates   | Size (bp) | Coverage (%) |
|--------------------------------------|---------------------------|-----------|--------------|
| APC_P_ALA1582PRO                     | chr5:112175996-112176075  | 80        | 100          |
| ASXL1_EX12                           | chr20:31022235-31027122   | 4888      | 99.71        |
| ATM_EX1                              | chr11:108093559-108093913 | 355       | 100          |
| ATM_EX10                             | chr11:108121428-108121799 | 372       | 100          |
| ATM_EX11                             | chr11:108122564-108122758 | 195       | 100          |
| ATM_EX12                             | chr11:108123544-108123639 | 96        | 90.62        |
| ATM_EX13                             | chr11:108124541-108124766 | 226       | 100          |
| ATM_EX14                             | chr11:108126942-108127067 | 126       | 100          |
| ATM_EX15                             | chr11:108128208-108128333 | 126       | 100          |
| ATM_EX16                             | chr11:108129713-108129802 | 90        | 100          |
| ATM_EX17                             | chr11:108137898-108138069 | 172       | 100          |
| ATM_EX18                             | chr11:108139137-108139336 | 200       | 100          |
| ATM_EX19                             | chr11:108141791-108141873 | 83        | 100          |
| ATM_EX2                              | chr11:108098322-108098423 | 102       | 100          |
| ATM_EX20                             | chr11:108141978-108142133 | 156       | 100          |
| ATM_EX21                             | chr11:108143259-108143334 | 76        | 100          |
| ATM_EX22                             | chr11:108143449-108143579 | 131       | 100          |
| ATM_EX23                             | chr11:108150218-108150335 | 118       | 100          |
| ATM_EX24                             | chr11:108151722-108151895 | 174       | 100          |
| ATM_EX25                             | chr11:108153437-108153606 | 170       | 100          |
| ATM_EX26                             | chr11:108154954-108155200 | 247       | 100          |
| ATM_EX27                             | chr11:108158327-108158442 | 116       | 100          |
| ATM_EX28                             | chr11:108159704-108159830 | 127       | 56.69        |
| ATM_EX29                             | chr11:108160329-108160528 | 200       | 100          |
| ATM_EX3                              | chr11:108098503-108098615 | 113       | 100          |
| ATM_EX30                             | chr11:108163346-108163520 | 175       | 100          |
| ATM_EX31                             | chr11:108164040-108164204 | 165       | 100          |
| ATM_EX32                             | chr11:108165654-108165786 | 133       | 100          |
| ATM_EX33                             | chr11:108168014-108168109 | 96        | 89.58        |
| ATM_EX34                             | chr11:108170441-108170612 | 172       | 100          |
| ATM_EX35                             | chr11:108172375-108172516 | 142       | 100          |
| ATM_EX36                             | chr11:108173580-108173756 | 177       | 100          |
| ATM_EX37                             | chr11:108175402-108175579 | 178       | 100          |
| ATM_EX38                             | chr11:108178624-108178711 | 88        | 100          |
| ATM_EX39                             | chr11:108180887-108181042 | 156       | 100          |
| ATM_EX4                              | chr11:108099905-108100050 | 146       | 100          |
| ATM_EX40                             | chr11:108183138-108183225 | 88        | 100          |
| ATM_EX41                             | chr11:108186550-108186638 | 89        | 100          |
| ATM_EX42                             | chr11:108186738-108186840 | 103       | 100          |
| ATM_EX43                             | chr11:108188100-108188248 | 149       | 100          |
| ATM_EX44                             | chr11:108190681-108190785 | 105       | 93.33        |
| ATM_EX45                             | chr11:108192028-108192147 | 120       | 100          |
| ATM_EX46                             | chr11:108196037-108196271 | 235       | 100          |
| ATM_EX47                             | chr11:108196785-108196952 | 168       | 100          |
| ATM_EX48                             | chr11:108198372-108198485 | 114       | 100          |
| ATM_EX49                             | chr11:108199748-108199965 | 218       | 100          |
| ATM_EX5                              | chr11:108106397-108106561 | 165       | 100          |
| ATM_EX50                             | chr11:108200941-108201148 | 208       | 100          |
| ATM_EX51                             | chr11:108202171-108202284 | 114       | 100          |
| ATM_EX52                             | chr11:108202606-108202764 | 159       | 100          |
| ATM_EX53                             | chr11:108203489-108203627 | 139       | 100          |
| ATM_EX54                             | chr11:108204613-108204695 | 83        | 100          |
| ATM_EX55                             | chr11:108205696-108205836 | 141       | 100          |
| ATM_EX56                             | chr11:108206572-108206688 | 117       | 100          |
| ATM_EX57                             | chr11:108213949-108214098 | 150       | 100          |
| ATM_EX58                             | chr11:108216470-108216635 | 166       | 100          |
| ATM_EX59                             | chr11:108218006-108218092 | 87        | 0            |
| ATM_EX6                              | chr11:108114680-108114845 | 166       | 100          |
| ATM_EX60                             | chr11:108224493-108224607 | 115       | 100          |
| ATM_EX61                             | chr11:108225538-108225601 | 64        | 100          |

SUPPLEMENTAL DOCUMENTS

|                            |                           |      |       |
|----------------------------|---------------------------|------|-------|
| ATM_EX62                   | chr11:108235809-108235945 | 137  | 100   |
| ATM_EX63                   | chr11:108236052-108239826 | 3775 | 90.07 |
| ATM_EX7                    | chr11:108115515-108115753 | 239  | 100   |
| ATM_EX8                    | chr11:108117691-108117854 | 164  | 100   |
| ATM_EX9                    | chr11:108119660-108119829 | 170  | 100   |
| BCL6_AMPL1                 | chr3:187440236-187440399  | 164  | 100   |
| BCL6_AMPL2                 | chr3:187442719-187442876  | 158  | 100   |
| BCL6_AMPL3                 | chr3:187443277-187443427  | 151  | 100   |
| BCL6_AMPL4                 | chr3:187444509-187444696  | 188  | 100   |
| BCL6_AMPL5                 | chr3:187446138-187446342  | 205  | 100   |
| BCL6_AMPL6                 | chr3:187446828-187447819  | 992  | 100   |
| BCL6_AMPL7                 | chr3:187449487-187449728  | 242  | 100   |
| BCL6_AMPL8                 | chr3:187451311-187451491  | 181  | 100   |
| BCOR_P_G1529EFSX4          | chrX:39914632-39914711    | 80   | 100   |
| BIRC3_EX6                  | chr11:102201730-102201972 | 243  | 100   |
| BIRC3_EX7                  | chr11:102206697-102206951 | 255  | 100   |
| BIRC3_EX8                  | chr11:102207491-102207532 | 42   | 100   |
| BIRC3_EX9                  | chr11:102207640-102210135 | 2496 | 99.6  |
| BRAF_EX15                  | chr7:140453075-140453193  | 119  | 100   |
| BTK_AMPL1                  | chrX:100604863-100604954  | 92   | 100   |
| BTK_AMPL10                 | chrX:100613595-100613694  | 100  | 100   |
| BTK_AMPL11                 | chrX:100614271-100614345  | 75   | 100   |
| BTK_AMPL12                 | chrX:100615066-100615148  | 83   | 100   |
| BTK_AMPL13                 | chrX:100615546-100615753  | 208  | 100   |
| BTK_AMPL14                 | chrX:100617151-100617238  | 88   | 100   |
| BTK_AMPL15                 | chrX:100617539-100617687  | 149  | 100   |
| BTK_AMPL16                 | chrX:100624976-100625077  | 102  | 100   |
| BTK_AMPL17                 | chrX:100626611-100626699  | 89   | 100   |
| BTK_AMPL18                 | chrX:100629514-100629632  | 119  | 100   |
| BTK_AMPL19                 | chrX:100630122-100630282  | 161  | 100   |
| BTK_AMPL2                  | chrX:100608172-100608349  | 178  | 100   |
| BTK_AMPL3                  | chrX:100608848-100608986  | 139  | 100   |
| BTK_AMPL4                  | chrX:100609608-100609692  | 85   | 100   |
| BTK_AMPL5                  | chrX:100611030-100611266  | 237  | 100   |
| BTK_AMPL6                  | chrX:100611762-100611953  | 192  | 100   |
| BTK_AMPL7                  | chrX:100612487-100612581  | 95   | 100   |
| BTK_AMPL8                  | chrX:100613137-100613158  | 22   | 100   |
| BTK_AMPL9                  | chrX:100613284-100613435  | 152  | 100   |
| CALR_AMPL1                 | chr19:13049484-13049594   | 111  | 100   |
| CALR_AMPL2                 | chr19:13049938-13050059   | 122  | 100   |
| CALR_AMPL3                 | chr19:13050232-13050455   | 224  | 100   |
| CALR_AMPL4                 | chr19:13050857-13050971   | 115  | 100   |
| CALR_AMPL5                 | chr19:13051047-13051276   | 230  | 100   |
| CALR_AMPL6                 | chr19:13051345-13051478   | 134  | 100   |
| CALR_AMPL7                 | chr19:13051548-13051711   | 164  | 100   |
| CALR_AMPL8                 | chr19:13054341-13054453   | 113  | 100   |
| CALR_AMPL9                 | chr19:13054517-13054737   | 221  | 100   |
| CARD11_EX4                 | chr7:2985453-2985590      | 138  | 100   |
| CARD11_EX5                 | chr7:2983846-2984171      | 326  | 100   |
| CARD11_EX6                 | chr7:2979383-2979562      | 180  | 100   |
| CARD11_EX7                 | chr7:2978313-2978465      | 153  | 100   |
| CARD11_EX8                 | chr7:2977541-2977666      | 126  | 100   |
| CARD11_EX9                 | chr7:2976671-2976868      | 198  | 100   |
| CBL_EX8                    | chr11:119148876-119149007 | 132  | 100   |
| CBL_EX9                    | chr11:119149220-119149423 | 204  | 100   |
| CD79A_EX5                  | chr19:42384934-42385439   | 506  | 100   |
| CD79B_EX5                  | chr17:62006794-62006835   | 42   | 100   |
| CDKN2A_EXON1               | chr9:21974647-21975127    | 481  | 100   |
| CDKN2A_EXON2               | chr9:21970871-21971237    | 367  | 100   |
| CDKN2A_EXON3               | chr9:21967722-21968271    | 550  | 100   |
| CEBPA_EX1                  | chr19:33790840-33793470   | 2631 | 100   |
| CLUU1_EX1                  | chr12:92817735-92819710   | 1976 | 99.65 |
| CLUU1_EX2                  | chr12:92822810-92824778   | 1969 | 100   |
| CRIPAK_NM_175918_C_294     | chr4:1388554-1388680      | 127  | 0     |
| CRIPAK_NM_175918_C_445_-CA | chr4:1388705-1388784      | 80   | 0     |

SUPPLEMENTAL DOCUMENTS

|                        |                          |      |       |
|------------------------|--------------------------|------|-------|
| CRIPAK_NM_175918_P_X22 | chr4:1388325-1388444     | 120  | 0     |
| CSF3R_AMPL1            | chr1:36931687-36931811   | 125  | 100   |
| CSF3R_AMPL10           | chr1:36937657-36937750   | 94   | 100   |
| CSF3R_AMPL11           | chr1:36937829-36938002   | 174  | 100   |
| CSF3R_AMPL12           | chr1:36938108-36938297   | 190  | 100   |
| CSF3R_AMPL13           | chr1:36939026-36939233   | 208  | 100   |
| CSF3R_AMPL14           | chr1:36939355-36939498   | 144  | 100   |
| CSF3R_AMPL15           | chr1:36940968-36941284   | 317  | 100   |
| CSF3R_AMPL16           | chr1:36945024-36945107   | 84   | 100   |
| CSF3R_AMPL2            | chr1:36931948-36932519   | 572  | 100   |
| CSF3R_AMPL3            | chr1:36932821-36932922   | 102  | 100   |
| CSF3R_AMPL4            | chr1:36933149-36933262   | 114  | 100   |
| CSF3R_AMPL5            | chr1:36933413-36933573   | 161  | 100   |
| CSF3R_AMPL6            | chr1:36933666-36933832   | 167  | 100   |
| CSF3R_AMPL7            | chr1:36934747-36934868   | 122  | 100   |
| CSF3R_AMPL8            | chr1:36935243-36935451   | 209  | 100   |
| CSF3R_AMPL9            | chr1:36937024-36937257   | 234  | 100   |
| CXCR4_EX2              | chr2:136871919-136873482 | 1564 | 100   |
| DNMT3A_EX1             | chr2:25565299-25565459   | 161  | 100   |
| DNMT3A_EX10            | chr2:25469489-25469645   | 157  | 100   |
| DNMT3A_EX11            | chr2:25469029-25469178   | 150  | 100   |
| DNMT3A_EX12            | chr2:25468889-25468933   | 45   | 100   |
| DNMT3A_EX13            | chr2:25468122-25468201   | 80   | 100   |
| DNMT3A_EX14            | chr2:25467409-25467521   | 113  | 100   |
| DNMT3A_EX15            | chr2:25467024-25467207   | 184  | 100   |
| DNMT3A_EX16            | chr2:25466767-25466851   | 85   | 100   |
| DNMT3A_EX17            | chr2:25464431-25464576   | 146  | 100   |
| DNMT3A_EX18            | chr2:25463509-25463599   | 91   | 100   |
| DNMT3A_EX19            | chr2:25463171-25463319   | 149  | 100   |
| DNMT3A_EX2             | chr2:25536782-25537030   | 249  | 100   |
| DNMT3A_EX20            | chr2:25461999-25462084   | 86   | 100   |
| DNMT3A_EX21            | chr2:25459805-25459874   | 70   | 100   |
| DNMT3A_EX22            | chr2:25458576-25458694   | 119  | 84.87 |
| DNMT3A_EX23            | chr2:25455830-25457289   | 1460 | 88.36 |
| DNMT3A_EX3             | chr2:25523008-25523112   | 105  | 100   |
| DNMT3A_EX4             | chr2:25505310-25505580   | 271  | 100   |
| DNMT3A_EX5             | chr2:25498369-25498412   | 44   | 100   |
| DNMT3A_EX6             | chr2:25497810-25497956   | 147  | 100   |
| DNMT3A_EX7             | chr2:25470906-25471121   | 216  | 100   |
| DNMT3A_EX8             | chr2:25470460-25470618   | 159  | 100   |
| DNMT3A_EX9             | chr2:25469920-25470027   | 108  | 100   |
| ETV6_EX1               | chr12:11802788-11803094  | 307  | 100   |
| ETV6_EX2               | chr12:11905384-11905513  | 130  | 100   |
| ETV6_EX3               | chr12:11992074-11992238  | 165  | 100   |
| ETV6_EX4               | chr12:12006361-12006495  | 135  | 100   |
| ETV6_EX5               | chr12:12022358-12022903  | 546  | 100   |
| ETV6_EX6               | chr12:12037379-12037521  | 143  | 100   |
| ETV6_EX7               | chr12:12038860-12038960  | 101  | 100   |
| ETV6_EX8               | chr12:12043875-12048325  | 4451 | 100   |
| EZH2_EX1               | chr7:148581256-148581441 | 186  | 100   |
| EZH2_EX10              | chr7:148514969-148515209 | 241  | 100   |
| EZH2_EX11              | chr7:148514314-148514483 | 170  | 100   |
| EZH2_EX12              | chr7:148513776-148513870 | 95   | 100   |
| EZH2_EX13              | chr7:148512598-148512638 | 41   | 63.41 |
| EZH2_EX14              | chr7:148512006-148512131 | 126  | 100   |
| EZH2_EX15              | chr7:148511051-148511229 | 179  | 100   |
| EZH2_EX16              | chr7:148508717-148508812 | 96   | 100   |
| EZH2_EX17              | chr7:148507425-148507506 | 82   | 100   |
| EZH2_EX18              | chr7:148506402-148506482 | 81   | 100   |
| EZH2_EX19              | chr7:148506163-148506247 | 85   | 100   |
| EZH2_EX2               | chr7:148544274-148544397 | 124  | 100   |
| EZH2_EX20              | chr7:148504464-148504798 | 335  | 100   |
| EZH2_EX3               | chr7:148543562-148543690 | 129  | 100   |
| EZH2_EX4               | chr7:148529726-148529842 | 117  | 100   |
| EZH2_EX5               | chr7:148526820-148526940 | 121  | 92.56 |

SUPPLEMENTAL DOCUMENTS

|                                     |                           |      |       |
|-------------------------------------|---------------------------|------|-------|
| EZH2_EX6                            | chr7:148525832-148525972  | 141  | 100   |
| EZH2_EX7                            | chr7:148524256-148524358  | 103  | 22.33 |
| EZH2_EX8                            | chr7:148523546-148523724  | 179  | 97.21 |
| EZH2_EX9                            | chr7:148516688-148516779  | 92   | 100   |
| FBXW7_EX10                          | chr4:153247158-153247383  | 226  | 100   |
| FBXW7_EX11                          | chr4:153245336-153245546  | 211  | 100   |
| FBXW7_EX9                           | chr4:153249360-153249541  | 182  | 100   |
| FLT3_AMPL1                          | chr13:28578179-28578321   | 143  | 100   |
| FLT3_AMPL10                         | chr13:28602305-28602435   | 131  | 100   |
| FLT3_AMPL11                         | chr13:28608014-28608138   | 125  | 100   |
| FLT3_AMPL12                         | chr13:28608209-28608361   | 153  | 100   |
| FLT3_AMPL13                         | chr13:28608428-28608554   | 127  | 100   |
| FLT3_AMPL14                         | chr13:28609622-28609820   | 199  | 100   |
| FLT3_AMPL15                         | chr13:28610062-28610190   | 129  | 100   |
| FLT3_AMPL16                         | chr13:28611312-28611435   | 124  | 100   |
| FLT3_AMPL17                         | chr13:28622402-28622590   | 189  | 100   |
| FLT3_AMPL18                         | chr13:28623511-28623684   | 174  | 100   |
| FLT3_AMPL19                         | chr13:28623762-28623921   | 160  | 100   |
| FLT3_AMPL2                          | chr13:28588579-28588704   | 126  | 100   |
| FLT3_AMPL20                         | chr13:28624222-28624369   | 148  | 100   |
| FLT3_AMPL21                         | chr13:28626672-28626821   | 150  | 100   |
| FLT3_AMPL22                         | chr13:28631474-28631609   | 136  | 100   |
| FLT3_AMPL23                         | chr13:28635994-28636216   | 223  | 100   |
| FLT3_AMPL24                         | chr13:28644618-28644759   | 142  | 100   |
| FLT3_AMPL25                         | chr13:28674595-28674657   | 63   | 100   |
| FLT3_AMPL3                          | chr13:28589284-28589403   | 120  | 100   |
| FLT3_AMPL4                          | chr13:28589717-28589848   | 132  | 100   |
| FLT3_AMPL5                          | chr13:28592585-28592736   | 152  | 100   |
| FLT3_AMPL6                          | chr13:28597477-28597624   | 148  | 100   |
| FLT3_AMPL7                          | chr13:28598988-28599090   | 103  | 100   |
| FLT3_AMPL8                          | chr13:28599530-28599562   | 33   | 100   |
| FLT3_AMPL9                          | chr13:28601215-28601388   | 174  | 100   |
| GNB1_NM_002074_P_LYS57GLU           | chr1:1747190-1747269      | 80   | 100   |
| GNB1_NM_002074_P_LYS89GLU           | chr1:1737877-1737956      | 80   | 98.75 |
| HNF1A_NM_000545_                    | chr12:121432078-121432157 | 80   | 100   |
| HNF1A_NM_000545_C_861_-G_P_X289X    | chr12:121432075-121432157 | 83   | 100   |
| HOXB9_P_ARG183HIS                   | chr17:46700428-46700507   | 80   | 100   |
| IDH1_EX4                            | chr2:209113093-209113384  | 292  | 100   |
| IDH2_EX4                            | chr15:90631819-90631979   | 161  | 100   |
| IKZF1_AMPL1                         | chr7:50358648-50358707    | 60   | 100   |
| IKZF1_AMPL2                         | chr7:50367224-50367363    | 140  | 100   |
| IKZF1_AMPL3                         | chr7:50435694-50436078    | 385  | 100   |
| IKZF1_AMPL4                         | chr7:50444221-50444501    | 281  | 100   |
| IKZF1_AMPL5_P_H163Y_P_ILE164SERFS29 | chr7:50450228-50450415    | 188  | 100   |
| IKZF1_AMPL6_P_E221SFSX36            | chr7:50455033-50455178    | 146  | 100   |
| IKZF1_AMPL7                         | chr7:50459417-50459571    | 155  | 100   |
| IKZF1_AMPL8_P_R502W                 | chr7:50467606-50468335    | 730  | 100   |
| IKZF2_P_ALA91VAL                    | chr2:213921652-213921731  | 80   | 100   |
| IKZF3_P_GLU318LYS                   | chr17:37922582-37922661   | 80   | 100   |
| IKZF3_P_THR326HISFS25               | chr17:37922559-37922638   | 80   | 100   |
| IRF8_EX1                            | chr16:85932774-85932829   | 56   | 100   |
| IRF8_EX2                            | chr16:85936621-85936795   | 175  | 100   |
| IRF8_EX3                            | chr16:85942596-85942779   | 184  | 100   |
| IRF8_EX4                            | chr16:85945176-85945264   | 89   | 100   |
| IRF8_EX5                            | chr16:85946737-85946842   | 106  | 100   |
| IRF8_EX6                            | chr16:85948079-85948126   | 48   | 100   |
| IRF8_EX7                            | chr16:85952023-85952409   | 387  | 100   |
| IRF8_EX8                            | chr16:85953715-85953830   | 116  | 100   |
| IRF8_EX9                            | chr16:85954712-85956211   | 1500 | 94.73 |
| JAK2_EX12                           | chr9:5069925-5070052      | 128  | 100   |
| JAK2_EX14                           | chr9:5073698-5073785      | 88   | 100   |
| KIT_EX10                            | chr4:55593384-55593490    | 107  | 100   |
| KIT_EX11                            | chr4:55593582-55593708    | 127  | 100   |
| KIT_EX17                            | chr4:55599236-55599358    | 123  | 91.87 |
| KIT_EX9                             | chr4:55592023-55592216    | 194  | 100   |



SUPPLEMENTAL DOCUMENTS

|                               |                           |      |       |
|-------------------------------|---------------------------|------|-------|
| KRAS_EX2                      | chr12:25398208-25398329   | 122  | 100   |
| KRAS_EX3                      | chr12:25380168-25380346   | 179  | 100   |
| MAP2K1_EXON2                  | chr15:66727335-66727605   | 271  | 96.31 |
| MAP2K1_EXON3                  | chr15:66729054-66729260   | 207  | 100   |
| MET_P_ASN375SER               | chr7:116340223-116340302  | 80   | 100   |
| MET_P_GLU168ASP               | chr7:116339603-116339682  | 80   | 100   |
| MLH1_P_ARG385CYS              | chr3:37067203-37067282    | 80   | 100   |
| MPL_EX10                      | chr1:43814934-43815030    | 97   | 100   |
| MYD88_EX3                     | chr3:38181879-38182083    | 205  | 100   |
| MYD88_EX4                     | chr3:38182248-38182339    | 92   | 100   |
| MYD88_EX5                     | chr3:38182623-38184512    | 1890 | 100   |
| NEFH_NM_021076_P_X657LYS      | chr22:29885559-29885638   | 80   | 65    |
| NOTCH1_EX26                   | chr9:139399125-139399556  | 432  | 100   |
| NOTCH1_EX27                   | chr9:139397634-139397782  | 149  | 100   |
| NOTCH1_EX28                   | chr9:139396724-139396940  | 217  | 100   |
| NOTCH1_EX34                   | chr9:139388885-139392010  | 3126 | 97.7  |
| NOTCH2_EX26                   | chr1:120466260-120466607  | 348  | 100   |
| NOTCH2_EX27                   | chr1:120465259-120465401  | 143  | 100   |
| NOTCH2_EX28                   | chr1:120464859-120465069  | 211  | 100   |
| NOTCH2_EX34                   | chr1:120454176-120459317  | 5142 | 99.75 |
| NRAS_EX2                      | chr1:115258671-115258798  | 128  | 100   |
| NRAS_EX3                      | chr1:115256421-115256599  | 179  | 100   |
| PAX3_NM_181459_P_GLU28        | chr2:223163214-223163293  | 80   | 100   |
| PAX3_NM_181459_P_THR227ILE    | chr2:223096870-223096949  | 80   | 100   |
| PHF6_P_A140T                  | chrX:133527943-133528022  | 80   | 100   |
| PTEN_EX5                      | chr10:89692770-89693008   | 239  | 100   |
| PTEN_EX7                      | chr10:89717610-89717776   | 167  | 100   |
| PTPN11_EX13                   | chr12:112926828-112926979 | 152  | 100   |
| PTPN11_EX3                    | chr12:112888122-112888316 | 195  | 100   |
| RB1_P_ARG358                  | chr13:48942646-48942725   | 80   | 100   |
| RB1_P_ASP332GLY               | chr13:48941646-48941725   | 80   | 100   |
| RET_P_SER649LEU               | chr10:43609955-43610034   | 80   | 100   |
| RUNX1_EX3                     | chr21:36265222-36265260   | 39   | 100   |
| RUNX1_EX4                     | chr21:36259140-36259393   | 254  | 100   |
| RUNX1_EX5                     | chr21:36252854-36253010   | 157  | 100   |
| RUNX1_EX6                     | chr21:36231771-36231875   | 105  | 100   |
| RUNX1_EX7                     | chr21:36206707-36206898   | 192  | 100   |
| RUNX1_EX8                     | chr21:36171598-36171759   | 162  | 100   |
| RUNX1_EX9                     | chr21:36160098-36164907   | 4810 | 98.59 |
| SETBP1_AMPL1                  | chr18:42281302-42281807   | 506  | 100   |
| SETBP1_AMPL2                  | chr18:42449185-42449258   | 74   | 100   |
| SETBP1_AMPL3                  | chr18:42456520-42456728   | 209  | 100   |
| SETBP1_AMPL4                  | chr18:42529836-42533315   | 3480 | 100   |
| SETBP1_AMPL5                  | chr18:42618440-42618630   | 191  | 100   |
| SETBP1_AMPL6                  | chr18:42643034-42643673   | 640  | 100   |
| SF3A2_NM_007165_P_X329X       | chr19:2248095-2248174     | 80   | 100   |
| SF3B1_EX13                    | chr2:198267673-198267759  | 87   | 100   |
| SF3B1_EX14                    | chr2:198267280-198267550  | 271  | 100   |
| SF3B1_EX15                    | chr2:198266709-198266854  | 146  | 100   |
| SF3B1_EX16                    | chr2:198266466-198266612  | 147  | 100   |
| SF3B1_EX17                    | chr2:198266124-198266249  | 126  | 100   |
| SF3B1_EX18                    | chr2:198265439-198265660  | 222  | 100   |
| SF3B4_NM_005850_P_X383X       | chr1:149895522-149895601  | 80   | 100   |
| SHOC2_P_S2G                   | chr10:112724081-112724160 | 80   | 100   |
| SRSF2_EX1                     | chr17:74732881-74733493   | 613  | 100   |
| SSC5D_NM_001144950_P_PRO1247X | chr19:56029344-56029423   | 80   | 100   |
| SSC5D_NM_001144950_P_X1146X   | chr19:56029041-56029120   | 80   | 100   |
| STAT3_EX19                    | chr17:40475278-40475372   | 95   | 100   |
| STAT3_EX20                    | chr17:40475022-40475161   | 140  | 100   |
| STAT3_EX21                    | chr17:40474303-40474512   | 210  | 100   |
| STAT3_EX22                    | chr17:40469200-40469242   | 43   | 100   |
| STAT3_EX23                    | chr17:40468807-40468919   | 113  | 100   |
| STAT3_EX24                    | chr17:40465343-40467818   | 2476 | 95.84 |
| TCL1A_EX1                     | chr14:96180284-96180533   | 250  | 100   |
| TCL1A_EX2                     | chr14:96178557-96178733   | 177  | 100   |

SUPPLEMENTAL DOCUMENTS

|                      |                          |      |       |
|----------------------|--------------------------|------|-------|
| TCL1A_EX3            | chr14:96178086-96178139  | 54   | 100   |
| TCL1A_EX4            | chr14:96176304-96177218  | 915  | 100   |
| TET2_EX1             | chr4:106067842-106068136 | 295  | 100   |
| TET2_EX10            | chr4:106193721-106194075 | 355  | 100   |
| TET2_EX11            | chr4:106196205-106200960 | 4756 | 99.81 |
| TET2_EX2             | chr4:106111517-106111662 | 146  | 100   |
| TET2_EX3             | chr4:106155054-106158508 | 3455 | 98.9  |
| TET2_EX4             | chr4:106162496-106162586 | 91   | 100   |
| TET2_EX5             | chr4:106163991-106164084 | 94   | 100   |
| TET2_EX6             | chr4:106164727-106164935 | 209  | 100   |
| TET2_EX7             | chr4:106180776-106180926 | 151  | 100   |
| TET2_EX8             | chr4:106182916-106183005 | 90   | 100   |
| TET2_EX9             | chr4:106190767-106190904 | 138  | 100   |
| TNFAIP3_EX1          | chr6:138188325-138188631 | 307  | 100   |
| TNFAIP3_EX2          | chr6:138192350-138192659 | 310  | 100   |
| TNFAIP3_EX3          | chr6:138195982-138196172 | 191  | 100   |
| TNFAIP3_EX4          | chr6:138196825-138196972 | 148  | 100   |
| TNFAIP3_EX5          | chr6:138197133-138197303 | 171  | 100   |
| TNFAIP3_EX6          | chr6:138198213-138198393 | 181  | 100   |
| TNFAIP3_EX7          | chr6:138199569-138200488 | 920  | 100   |
| TNFAIP3_EX8          | chr6:138201208-138201389 | 182  | 100   |
| TNFAIP3_EX9          | chr6:138202172-138204451 | 2280 | 98.16 |
| TP53_EX10            | chr17:7573927-7574033    | 107  | 100   |
| TP53_EX11            | chr17:7571720-7573008    | 1289 | 98.37 |
| TP53_EX2             | chr17:7579839-7579940    | 102  | 100   |
| TP53_EX3             | chr17:7579700-7579721    | 22   | 100   |
| TP53_EX4             | chr17:7579312-7579590    | 279  | 100   |
| TP53_EX5             | chr17:7578371-7578554    | 184  | 100   |
| TP53_EX6             | chr17:7578177-7578289    | 113  | 100   |
| TP53_EX7             | chr17:7577499-7577608    | 110  | 100   |
| TP53_EX8             | chr17:7577019-7577155    | 137  | 100   |
| TP53_EX9             | chr17:7576853-7576926    | 74   | 100   |
| U2AF1_AMPL1          | chr21:44513202-44513369  | 168  | 100   |
| U2AF1_AMPL10         | chr21:44524425-44524512  | 88   | 100   |
| U2AF1_AMPL11         | chr21:44527551-44527614  | 64   | 100   |
| U2AF1_AMPL2          | chr21:44514571-44514683  | 113  | 100   |
| U2AF1_AMPL3          | chr21:44514755-44514908  | 154  | 100   |
| U2AF1_AMPL4          | chr21:44514765-44514898  | 134  | 100   |
| U2AF1_AMPL5          | chr21:44515538-44515656  | 119  | 100   |
| U2AF1_AMPL6          | chr21:44515794-44515863  | 70   | 100   |
| U2AF1_AMPL7          | chr21:44520553-44520639  | 87   | 100   |
| U2AF1_AMPL8          | chr21:44521466-44521552  | 87   | 100   |
| U2AF1_AMPL9          | chr21:44524415-44524522  | 108  | 100   |
| UBE2G2_P_ASP63VAL    | chr21:46197231-46197310  | 80   | 100   |
| VHL_P_PRO81SER       | chr3:10183733-10183812   | 80   | 100   |
| WT1_AMPL1            | chr11:32410594-32410735  | 142  | 100   |
| WT1_AMPL10           | chr11:32452066-32452095  | 30   | 100   |
| WT1_AMPL11           | chr11:32456236-32456901  | 666  | 100   |
| WT1_AMPL2            | chr11:32413508-32413620  | 113  | 100   |
| WT1_AMPL3            | chr11:32414202-32414311  | 110  | 100   |
| WT1_AMPL4            | chr11:32417793-32417963  | 171  | 100   |
| WT1_AMPL5            | chr11:32421484-32421600  | 117  | 100   |
| WT1_AMPL6            | chr11:32438026-32438096  | 71   | 100   |
| WT1_AMPL7            | chr11:32439113-32439210  | 98   | 100   |
| WT1_AMPL8            | chr11:32449492-32449614  | 123  | 100   |
| WT1_AMPL9            | chr11:32450033-32450175  | 143  | 100   |
| ZEB2_P_ASP268ARGFS12 | chr2:145161450-145161529 | 80   | 100   |
| ZEB2_P_GLY626ARG     | chr2:145156839-145156918 | 80   | 100   |
| ZEB2_P_LEU420ARG     | chr2:145157456-145157535 | 80   | 100   |
| ZRSR2_AMPL1          | chrX:15808609-15808669   | 61   | 100   |
| ZRSR2_AMPL10         | chrX:15838320-15838449   | 130  | 100   |
| ZRSR2_AMPL11         | chrX:15840844-15841375   | 532  | 94.92 |
| ZRSR2_AMPL2          | chrX:15809047-15809146   | 100  | 100   |
| ZRSR2_AMPL3          | chrX:15817985-15818086   | 102  | 100   |
| ZRSR2_AMPL4          | chrX:15821801-15821929   | 129  | 100   |

SUPPLEMENTAL DOCUMENTS

|             |                       |     |     |
|-------------|-----------------------|-----|-----|
| ZRSR2_AMPL5 | chr:15822224-15822330 | 107 | 100 |
| ZRSR2_AMPL6 | chr:15826346-15826404 | 59  | 100 |
| ZRSR2_AMPL7 | chr:15827313-15827451 | 139 | 100 |
| ZRSR2_AMPL8 | chr:15833790-15834023 | 234 | 100 |
| ZRSR2_AMPL9 | chr:15836700-15836775 | 76  | 100 |

**Table S3: Purity of each fraction.** ND: not done because small amounts of cells, stored for NGS analysis only.

| Patient | fraction  | purity |
|---------|-----------|--------|
| N1      | Blasts    | 98.5   |
|         | pDCs      | 96.8   |
|         | Monocytes | 98.9   |
|         | T-cells   | 99.0   |
| N2      | Blasts    | 99.1   |
|         | pDCs      | 98.9   |
|         | Monocytes | 99.8   |
|         | T-cells   | 99.6   |
| N7      | Blasts    | 97.8   |
|         | pDCs      | 98.0   |
|         | Monocytes | 98.3   |
|         | T-cells   | 99.0   |
| N8      | Blasts    | 98.6   |
|         | pDCs      | 99.1   |
|         | Monocytes | 98.9   |
|         | T-cells   | 98.4   |
|         | cDCs      | 100.0  |
| N9      | Blasts    | ND     |
|         | pDCs      | ND     |
|         | Monocytes | ND     |
|         | T-cells   | ND     |
| N11     | Blasts    | 99.3   |
|         | pDCs      | 94.9   |
|         | Monocytes | 99.4   |
|         | T-cells   | 99.3   |
| N12     | Blasts    | 99.7   |
|         | pDCs      | 93.7   |
|         | Monocytes | 99.5   |
|         | T-cells   | 99.3   |
| N13     | Blasts    | 98.2   |
|         | pDCs      | 84.1   |
|         | Monocytes | 96.0   |
|         | T-cells   | 99.2   |
| N14     | Blasts    | 96.3   |
|         | pDCs      | 93.3   |
|         | Monocytes | 97.9   |
|         | T-cells   | 97.3   |
| N16     | Blasts    | 97.0   |
|         | pDCs      | 90.3   |
|         | Monocytes | 87.0   |
|         | T-cells   | 99.0   |
| N19     | Blasts    | 98.0   |
|         | pDCs      | 94.5   |
|         | Monocytes | 94.6   |
|         | T-cells   | 98.9   |

| patient | fraction  | purity |
|---------|-----------|--------|
| N20     | Blasts    | 98.6   |
|         | pDCs      | 96.1   |
|         | Monocytes | 92.7   |
|         | T-cells   | 96.2   |
| N34     | Blasts    | 99.8   |
|         | pDCs      | 99.0   |
|         | Monocytes | 99.4   |
|         | T-cells   | 99.0   |
| N35     | Blasts    | 95.8   |
|         | pDCs      | ND     |
|         | Monocytes | 99.0   |
|         | T-cells   | 96.8   |
| N36     | Blasts    | 98.8   |
|         | pDCs      | 96.2   |
|         | T-cells   | 99.4   |
|         | T-cells   | 99.4   |

SUPPLEMENTAL DOCUMENTS

Table S4: Mutations detected by NGS.

| Gene   | Transcripts | Exon | cDNA coordinates | protein coordinates | Genomic coordinates      | Type                 | Sample   | Quality Score | Frequency | Number of mutated reads | Number of total reads | GenerateReports Class  | InterVar               | dbSNP | COSMIC ID | COSMIC tissue | ClinVar | PopFreqMax | EMAC_ALL | SIFT | polyphen2_HDIV | polyphen2_HVAR | LRT | MutationTaster | MutationAssessor | FATHMM | PROVEAN | VEST3 | MetaSVM | MetaLR | MCAP | CADD | DANN | fathmm_MKL_coding | GERP |  |  |  |  |
|--------|-------------|------|------------------|---------------------|--------------------------|----------------------|----------|---------------|-----------|-------------------------|-----------------------|------------------------|------------------------|-------|-----------|---------------|---------|------------|----------|------|----------------|----------------|-----|----------------|------------------|--------|---------|-------|---------|--------|------|------|------|-------------------|------|--|--|--|--|
| ASXL1  | NM_015338   | 12   | c.A2123G         | p.Q708R             | chr20:g.3102263<br>8A>G  | homozygous SNV       | N11-BI   | 1061          | 38.3      | 203                     | 530                   | Uncertain significance | Uncertain significance |       |           |               |         |            |          |      |                |                |     |                |                  |        |         |       |         |        |      |      |      |                   |      |  |  |  |  |
| ASXL1  | NM_015338   | 12   | c.A2123G         | p.Q708R             | chr20:g.3102263<br>8A>G  | homozygous SNV       | N11-mono | 1044.43       | 58.25     | 113                     | 194                   | Uncertain significance | Uncertain significance |       |           |               |         |            |          |      |                |                |     |                |                  |        |         |       |         |        |      |      |      |                   |      |  |  |  |  |
| ASXL1  | NM_015338   | 12   | c.A2123G         | p.Q708R             | chr20:g.3102263<br>8A>G  | homozygous SNV       | N11-pDC  | 2223.51       | 54.88     | 658                     | 1199                  | Uncertain significance | Uncertain significance |       |           |               |         |            |          |      |                |                |     |                |                  |        |         |       |         |        |      |      |      |                   |      |  |  |  |  |
| ASXL1  | NM_015338   | 12   | c.G2362T         | p.E788X             | chr20:g.3102287<br>7G>T  | stopgain             | N12-BL   | 2122.04       | 48.27     | 474                     | 982                   | Likely pathogenic      | Uncertain significance |       |           |               |         |            |          |      |                |                |     |                |                  |        |         |       |         |        |      |      |      |                   |      |  |  |  |  |
| ASXL1  | NM_015338   | 12   | c.G2362T         | p.E788X             | chr20:g.3102287<br>7G>T  | stopgain             | N12-MONO | 1351.34       | 46.92     | 183                     | 390                   | Likely pathogenic      | Uncertain significance |       |           |               |         |            |          |      |                |                |     |                |                  |        |         |       |         |        |      |      |      |                   |      |  |  |  |  |
| ASXL1  | NM_015338   | 12   | c.G2362T         | p.E788X             | chr20:g.3102287<br>7G>T  | stopgain             | N12-PDC  | 2567.24       | 49.28     | 785                     | 1593                  | Likely pathogenic      | Uncertain significance |       |           |               |         |            |          |      |                |                |     |                |                  |        |         |       |         |        |      |      |      |                   |      |  |  |  |  |
| ASXL1  | NM_015338   | 12   | c.C2757dupA      | p.P920Tfs*1         | chr20:g.3102327<br>1->A  | Frameshift insertion | N9-BI    | 762.45        | 46.36     | 121                     | 261                   | Likely pathogenic      | Uncertain significance |       |           |               |         |            |          |      |                |                |     |                |                  |        |         |       |         |        |      |      |      |                   |      |  |  |  |  |
| ASXL1  | NM_015338   | 12   | c.C2757dupA      | p.P920Tfs*1         | chr20:g.3102327<br>1->A  | Frameshift insertion | N9-Mono  | 299.57        | 26.32     | 34                      | 93                    | Likely pathogenic      | Uncertain significance |       |           |               |         |            |          |      |                |                |     |                |                  |        |         |       |         |        |      |      |      |                   |      |  |  |  |  |
| ASXL1  | NM_015338   | 12   | c.C2757dupA      | p.P920Tfs*1         | chr20:g.3102327<br>1->A  | Frameshift insertion | N9-pDC   | 299.57        | 26.32     | 40                      | 152                   | Likely pathogenic      | Uncertain significance |       |           |               |         |            |          |      |                |                |     |                |                  |        |         |       |         |        |      |      |      |                   |      |  |  |  |  |
| CBL    | NM_005188   | 8    | c.G1211A         | p.C404Y             | chr11:g.1191489<br>91G>A | homozygous SNV       | N13-BI   | 214.63        | 48.3      | 398                     | 824                   | Likely pathogenic      | Uncertain significance |       |           |               |         |            |          |      |                |                |     |                |                  |        |         |       |         |        |      |      |      |                   |      |  |  |  |  |
| CBL    | NM_005188   | 8    | c.G1211A         | p.C404Y             | chr11:g.1191489<br>91G>A | homozygous SNV       | N13-Mono | 192.75        | 44.09     | 496                     | 1125                  | Likely pathogenic      | Uncertain significance |       |           |               |         |            |          |      |                |                |     |                |                  |        |         |       |         |        |      |      |      |                   |      |  |  |  |  |
| CBL    | NM_005188   | 8    | c.G1211A         | p.C404Y             | chr11:g.1191489<br>91G>A | homozygous SNV       | N13-pDC  | 220.87        | 49.19     | 427                     | 868                   | Likely pathogenic      | Uncertain significance |       |           |               |         |            |          |      |                |                |     |                |                  |        |         |       |         |        |      |      |      |                   |      |  |  |  |  |
| CBL    | NM_005188   | 8    | c.T1253G         | p.F418C             | chr11:g.1191492<br>45T>G | homozygous SNV       | N8-BI    | 1030.8        | 62.69     | 84                      | 134                   | Likely pathogenic      | Uncertain significance |       |           |               |         |            |          |      |                |                |     |                |                  |        |         |       |         |        |      |      |      |                   |      |  |  |  |  |
| CBL    | NM_005188   | 8    | c.T1253G         | p.F418C             | chr11:g.1191492<br>45T>G | homozygous SNV       | N8-pDC   | 500           | 94.85     | 387                     | 408                   | Likely pathogenic      | Uncertain significance |       |           |               |         |            |          |      |                |                |     |                |                  |        |         |       |         |        |      |      |      |                   |      |  |  |  |  |
| CBL    | NM_005188   | 8    | c.T1253G         | p.F418C             | chr11:g.1191492<br>45T>G | homozygous SNV       | N8-mono  | 2654.79       | 90.11     | 246                     | 273                   | Likely pathogenic      | Uncertain significance |       |           |               |         |            |          |      |                |                |     |                |                  |        |         |       |         |        |      |      |      |                   |      |  |  |  |  |
| CBL    | NM_005188   | 8    | c.T1253G         | p.F418C             | chr11:g.1191492<br>45T>G | homozygous SNV       | N8-pDC   | 500           | 98.37     | 301                     | 306                   | Likely pathogenic      | Uncertain significance |       |           |               |         |            |          |      |                |                |     |                |                  |        |         |       |         |        |      |      |      |                   |      |  |  |  |  |
| DNMT3A | NM_175629   | 23   | c.C2644T         | p.R882C             | chr2:g.25457243<br>G>A   | homozygous SNV       | N19-BL   | 630.03        | 42.26     | 251                     | 594                   | Likely pathogenic      | Uncertain significance |       |           |               |         |            |          |      |                |                |     |                |                  |        |         |       |         |        |      |      |      |                   |      |  |  |  |  |
| DNMT3A | NM_175629   | 23   | c.C2644T         | p.R882C             | chr2:g.25457243<br>G>A   | homozygous SNV       | N19-mono | 640.96        | 48.69     | 167                     | 343                   | Likely pathogenic      | Uncertain significance |       |           |               |         |            |          |      |                |                |     |                |                  |        |         |       |         |        |      |      |      |                   |      |  |  |  |  |
| DNMT3A | NM_022552   | 23   | c.C2644T         | p.R882C             | chr2:g.25457243<br>G>A   | homozygous SNV       | N19-pDC  | 765.05        | 54.92     | 201                     | 366                   | Likely pathogenic      | Uncertain significance |       |           |               |         |            |          |      |                |                |     |                |                  |        |         |       |         |        |      |      |      |                   |      |  |  |  |  |
| DNMT3A | NM_022552   | 23   | c.C2644T         | p.R882C             | chr2:g.25457243<br>G>A   | homozygous SNV       | N2-BI    | 747.75        | 48.77     | 278                     | 570                   | Likely pathogenic      | Uncertain significance |       |           |               |         |            |          |      |                |                |     |                |                  |        |         |       |         |        |      |      |      |                   |      |  |  |  |  |
| DNMT3A | NM_175629   | 23   | c.C2644T         | p.R882C             | chr2:g.25457243<br>G>A   | homozygous SNV       | N2-Mono  | 851.01        | 48.67     | 514                     | 1056                  | Likely pathogenic      | Uncertain significance |       |           |               |         |            |          |      |                |                |     |                |                  |        |         |       |         |        |      |      |      |                   |      |  |  |  |  |
| DNMT3A | NM_175629   | 23   | c.C2644T         | p.R882C             | chr2:g.25457243<br>G>A   | homozygous SNV       | N2-pDC   | 775.42        | 45.41     | 475                     | 1046                  | Likely pathogenic      | Uncertain significance |       |           |               |         |            |          |      |                |                |     |                |                  |        |         |       |         |        |      |      |      |                   |      |  |  |  |  |
| DNMT3A | NM_022552   | 23   | c.G2645A         | p.R882H             | chr2:g.25457242<br>C>T   | homozygous SNV       | N36-BI   | 204.63        | 57.14     | 16                      | 28                    | Likely pathogenic      | Uncertain significance |       |           |               |         |            |          |      |                |                |     |                |                  |        |         |       |         |        |      |      |      |                   |      |  |  |  |  |
| DNMT3A | NM_022552   | 23   | c.G2645A         | p.R882H             | chr2:g.25457242<br>C>T   | homozygous SNV       | N36-Mono | 9             | 22        | 248                     | 248                   | Likely pathogenic      | Uncertain significance |       |           |               |         |            |          |      |                |                |     |                |                  |        |         |       |         |        |      |      |      |                   |      |  |  |  |  |
| DNMT3A | NM_022552   | 23   | c.G2645A         | p.R882H             | chr2:g.25457242<br>C>T   | homozygous SNV       | N36-pDC  | 577.67        | 53.3      | 105                     | 197                   | Likely pathogenic      | Uncertain significance |       |           |               |         |            |          |      |                |                |     |                |                  |        |         |       |         |        |      |      |      |                   |      |  |  |  |  |
| EZH2   | NM_00120328 | 4    | c.C889T          | p.H297Y             | chr7:g.14852356<br>4G>A  | homozygous SNV       | N13-BI   | 562.09        | 36.56     | 215                     | 588                   | Likely pathogenic      | Uncertain significance |       |           |               |         |            |          |      |                |                |     |                |                  |        |         |       |         |        |      |      |      |                   |      |  |  |  |  |
| EZH2   | NM_00120328 | 4    | c.C889T          | p.H297Y             | chr7:g.14852356<br>4G>A  | homozygous SNV       | N13-Mono | 1967.64       | 55.65     | 754                     | 1355                  | Likely pathogenic      | Likely pathogenic      |       |           |               |         |            |          |      |                |                |     |                |                  |        |         |       |         |        |      |      |      |                   |      |  |  |  |  |
| EZH2   | NM_00120328 | 4    | c.C889T          | p.H297Y             | chr7:g.14852356<br>4G>A  | homozygous SNV       | N13-Mono | 11.69         | 70        | 599                     | 599                   | Likely pathogenic      | Uncertain significance |       |           |               |         |            |          |      |                |                |     |                |                  |        |         |       |         |        |      |      |      |                   |      |  |  |  |  |











SUPPLEMENTAL DOCUMENTS

| ASXL1  | NM_015338: exon12:c.193dupG(p.G646WfsX12) | E.1934dupG       | p.G646WfsX12 | p.1934dupG         | chr20:g.3102244T>G   | frameshift insertion | P89     | P15.85 | 47.13 | B2   | L74                    | Benign                 | Uncertain significance | s756958159                             | CSOM1411076                                                                                                                                                                                                                                | I[large_intestine] | D.031  | D.0016 | D | D | D | D | M | F | D | D | D | D | D | D | D | D | D | D | D | D | D | D |   |   |   |   |   |   |   |
|--------|-------------------------------------------|------------------|--------------|--------------------|----------------------|----------------------|---------|--------|-------|------|------------------------|------------------------|------------------------|----------------------------------------|--------------------------------------------------------------------------------------------------------------------------------------------------------------------------------------------------------------------------------------------|--------------------|--------|--------|---|---|---|---|---|---|---|---|---|---|---|---|---|---|---|---|---|---|---|---|---|---|---|---|---|---|---|
| ATM    | NM_000051                                 | E.74324C         | p.Y1442H     | chr11:10816041G>C  | homozygous SNV       | P5                   | 142.59  | 21.92  | 32    | 146  | Likely pathogenic      | Uncertain significance | s20166889              | CSOM41590                              | I[large_intestine]                                                                                                                                                                                                                         | D.0007             | D.0004 | D      | D | D | D | D | M | F | D | D | D | D | D | D | D | D | D | D | D | D | D | D | D |   |   |   |   |   |   |
| CXCR4  | NM_0010085140                             | E.C452T          | p.P151L      | chr2:136873058G>A  | homozygous SNV       | P2                   | 142.59  | 21.92  | 32    | 146  | Likely pathogenic      | Uncertain significance |                        |                                        |                                                                                                                                                                                                                                            |                    |        |        |   |   |   |   | N | F | N | D | D | D | D | D | D | D | D | D | D | D | D | D | D | D |   |   |   |   |   |
| ETV6   | NM_001987                                 | E.C799T          | p.Q267X      | chr12:12022693C>T  | stopgain             | P4                   | 1338.24 | 59.95  | 259   | 432  | Likely pathogenic      | Likely pathogenic      |                        |                                        |                                                                                                                                                                                                                                            |                    |        |        |   |   |   |   |   |   |   |   |   |   |   |   |   |   |   |   |   |   |   |   |   |   |   |   |   |   |   |
| DH2    | NM_002168                                 | E.G419A          | p.R140Q      | chr15:90631934C>T  | homozygous SNV       | P2                   |         | 42.27  | 52    | 123  | Likely pathogenic      | Uncertain significance | s121913502             | CSOM41590                              | I1[haematopoietic_and_lymphoid_tissue]1[NS]                                                                                                                                                                                                | D.0003             | D.0001 | D      | D | D | D | D | M | F | D | D | D | D | D | D | D | D | D | D | D | D | D | D | D | D |   |   |   |   |   |
| DH2    | NM_002168                                 | E.G419A          | p.R140Q      | chr15:90631934C>T  | homozygous SNV       | P38                  | 858.62  | 87.1   | 770   | 884  | Likely pathogenic      | Uncertain significance | s121913502             | CSOM41590                              | I1[haematopoietic_and_lymphoid_tissue]1[NS]                                                                                                                                                                                                | D.0003             | D.0001 | D      | D | D | D | D | M | F | D | D | D | D | D | D | D | D | D | D | D | D | D | D | D | D |   |   |   |   |   |
| KZF1   | NM_001291847                              | E.G85T           | p.E29X       | chr7:503672786G>T  | stopgain             | P9                   | 1156.66 | 46.12  | 892   | 850  | Likely pathogenic      | Likely pathogenic      |                        |                                        |                                                                                                                                                                                                                                            |                    |        |        |   |   |   |   |   |   |   |   |   |   |   |   |   |   |   |   |   |   |   |   |   |   |   |   |   |   |   |
| KZF1   | NM_006060                                 | E.C45T           | p.Q149X      | chr7:50450261C>T   | stopgain             | P89                  | 335.98  | 33.43  | 228   | 582  | Likely pathogenic      | Likely pathogenic      |                        |                                        |                                                                                                                                                                                                                                            |                    |        |        |   |   |   |   |   |   |   |   |   |   |   |   |   |   |   |   |   |   |   |   |   |   |   |   |   |   |   |
| KZF3   | NM_183229                                 | E.C565A          | p.L189I      | chr17:37947696G>T  | homozygous SNV       | P5                   | 478.39  | 33.92  | 58    | 171  | Likely pathogenic      | Uncertain significance |                        |                                        |                                                                                                                                                                                                                                            |                    |        |        |   |   |   |   |   |   |   |   |   |   |   |   |   |   |   |   |   |   |   |   |   |   |   |   |   |   |   |
| IAK2   | NM_004972                                 | E.G1849T         | p.V617F      | chr9:5073770G>T    | homozygous SNV       | P9                   | 2124.45 | 56.07  | 2706  | 4826 | Likely pathogenic      | Likely pathogenic      | s77375493              | CSOM12600                              | I[central_nervous_system]3[lung]3[haematopoietic_and_lymphoid_tissue]                                                                                                                                                                      | D.0008             | D.0007 | D      | D | D | D | D | M | F | D | D | D | D | D | D | D | D | D | D | D | D | D | D | D | D | D |   |   |   |   |
| KRAS   | NM_004985                                 | E.A183C          | p.Q61H       | chr12:25380275T>G  | homozygous SNV       | P1                   | 1274.84 | 38.59  | 818   | 824  | Likely pathogenic      | Uncertain significance | s17851045              | CSOM554<br>CSOM1135364                 | I[ovary]2[endometrium]1[breast]1[skin]2[small_intestine]4[liver]1[kidney]35[pancreas]1[urinary_tract]1[biliary_tract]5[large_intestine]13[lung]1[thyroid]1[haematopoietic_and_lymphoid_tissue]                                             | D                  | D      | D      | D | D | D | M | F | D | D | D | D | D | D | D | D | D | D | D | D | D | D | D | D | D | D | D | D |   |   |
| MET    | NM_000245                                 | E.A1127G         | p.K376R      | chr7:116340265G>T  | homozygous SNV       | P11                  | 2228.39 | 48.98  | 410   | 837  | Uncertain significance | Uncertain significance |                        |                                        |                                                                                                                                                                                                                                            |                    |        |        |   |   |   |   |   |   |   |   |   |   |   |   |   |   |   |   |   |   |   |   |   |   |   |   |   |   |   |
| NOTCH2 | NM_00244084                               | E.A6295G         | p.M2099V     | chr11:120459050T>C | homozygous SNV       | P11                  | 84.73   | 26.37  | 807   | 1164 | Likely benign          | Likely benign          | s201584590             |                                        |                                                                                                                                                                                                                                            |                    |        |        |   |   |   |   |   |   |   |   |   |   |   |   |   |   |   |   |   |   |   |   |   |   |   |   |   |   |   |
| NRAS   | NM_002524                                 | E.G35A           | p.G12D       | chr11:115258747G>T | homozygous SNV       | P8                   | 717.61  | 35.67  | 173   | 485  | Likely pathogenic      | Likely pathogenic      | s121913237             | CSOM564                                | I[skin]3[biliary_tract]4[large_intestine]1[genital_tract]1[kidney]1[pancreas]1[ovary]2[soft_tissue]4[endometrium]2[thyroid]1[lung]3[testis]3[haematopoietic_and_lymphoid_tissue]1[central_nervous_system]1[upper_aerodigestive_tract]2[NS] | D.0001             | D      | D      | D | D | D | M | F | D | D | D | D | D | D | D | D | D | D | D | D | D | D | D | D | D | D | D | D | D | D |
| NRAS   | NM_002524                                 | E.G34C           | p.G12R       | chr11:115258748C>G | homozygous SNV       | P37                  | 678.51  | 29.14  | 250   | 858  | Likely pathogenic      | Likely pathogenic      | s121913250             | CSOM561                                | I[haematopoietic_and_lymphoid_tissue]1[lung]1[NS]1[large_intestine]1[urinary_tract]5[skin]1[salivary_gland]                                                                                                                                | D                  | D      | D      | D | D | D | M | F | D | D | D | D | D | D | D | D | D | D | D | D | D | D | D | D | D | D | D | D |   |   |
| SRSF2  | NM_003016                                 | E.C284T          | p.P95L       | chr17:74732959G>A  | homozygous SNV       | P71                  | 324.5   | 36.54  | 98    | 104  | Likely pathogenic      | Uncertain significance | s751713049             | CSOM146288<br>CSOM211028               | I[haematopoietic_and_lymphoid_tissue]                                                                                                                                                                                                      | D.0001             | D.0001 | D      | D | D | D | D | M | F | D | D | D | D | D | D | D | D | D | D | D | D | D | D | D | D | D |   |   |   |   |
| SRSF2  | NM_003016                                 | E.C284A          | p.P95H       | chr17:74732959G>T  | homozygous SNV       | P37                  | 159.79  | 41.73  | 53    | 127  | Likely pathogenic      | Uncertain significance | s751713049             | CSOM211029<br>CSOM211505<br>CSOM211504 | I[haematopoietic_and_lymphoid_tissue]                                                                                                                                                                                                      | D.0002             | D.0001 | D      | D | D | D | D | M | F | D | D | D | D | D | D | D | D | D | D | D | D | D | D | D | D | D |   |   |   |   |
| TET2   | NM_001127218                              | E.A285dupT       | p.E1428fsX1  | chr4:106193822G>T  | frameshift insertion | P31                  | 1737.4  | 96.88  | 2476  | 5714 | Likely pathogenic      |                        |                        |                                        |                                                                                                                                                                                                                                            |                    |        |        |   |   |   |   |   |   |   |   |   |   |   |   |   |   |   |   |   |   |   |   |   |   |   |   |   |   |   |
| TET2   | NM_001127218                              | E.C64A           | p.P22T       | chr4:106155163C>A  | homozygous SNV       | P5                   | 202.65  | 33     | 23    | 100  | Likely pathogenic      | Uncertain significance |                        |                                        |                                                                                                                                                                                                                                            |                    |        |        |   |   |   |   |   |   |   |   |   |   |   |   |   |   |   |   |   |   |   |   |   |   |   |   |   |   |   |
| TET2   | NM_001127218                              | E.G50delC        | p.V218W      | chr4:106155749C>   | homozygous SNV       | P9                   | 9000    | 85.9   | 2279  | 2653 | Likely pathogenic      | Uncertain significance |                        |                                        |                                                                                                                                                                                                                                            |                    |        |        |   |   |   |   |   |   |   |   |   |   |   |   |   |   |   |   |   |   |   |   |   |   |   |   |   |   |   |
| TET2   | NM_001127218                              | E.G2392T         | p.E798X      | chr4:106157491G>T  | stopgain             | P31                  | 881.34  | 27.36  | 776   | 2836 | Likely pathogenic      | Uncertain significance |                        |                                        |                                                                                                                                                                                                                                            |                    |        |        |   |   |   |   |   |   |   |   |   |   |   |   |   |   |   |   |   |   |   |   |   |   |   |   |   |   |   |
| TET2   | NM_001127218                              | E.A2698T         | p.K900X      | chr4:106157797A>T  | stopgain             | P3                   | 603.39  | 48.78  | 801   | 517  | Likely pathogenic      | Uncertain significance |                        |                                        |                                                                                                                                                                                                                                            |                    |        |        |   |   |   |   |   |   |   |   |   |   |   |   |   |   |   |   |   |   |   |   |   |   |   |   |   |   |   |
| TET2   | NM_001127218                              | E.C2746T         | p.Q916X      | chr4:106157845C>T  | stopgain             | P71                  | 1406.47 | 91.47  | 543   | 703  | Likely pathogenic      | Uncertain significance | s780710758             | CSOM43417                              | I2[haematopoietic_and_lymphoid_tissue]                                                                                                                                                                                                     | D.0001             | D      | D      | D | D | D | M | F | D | D | D | D | D | D | D | D | D | D | D | D | D | D | D | D | D |   |   |   |   |   |
| TET2   | NM_001127218                              | E.3140_3141delCT | L1048delXCT  | chr4:106158239G>T  | frameshift deletion  | P36                  | 38.38   | 147    | 883   |      | Likely pathogenic      |                        |                        |                                        |                                                                                                                                                                                                                                            |                    |        |        |   |   |   |   |   |   |   |   |   |   |   |   |   |   |   |   |   |   |   |   |   |   |   |   |   |   |   |
| TET2   | NM_001127218                              | E.G3404A         | p.C1135Y     | chr4:106158503G>A  | homozygous SNV       | P11                  | 623.5   | 41.53  | 98    | 236  | Likely pathogenic      | Uncertain significance | s769422572             |                                        |                                                                                                                                                                                                                                            |                    |        |        |   |   |   |   |   |   |   |   |   |   |   |   |   |   |   |   |   |   |   |   |   |   |   |   |   |   |   |

SUPPLEMENTAL DOCUMENTS

| TET2  | NM_00112728 | A3881G        | p.Y1294C  | chr4:106180853 A>G | homoynomous SNV         | P6  | 1657.4  | 84.25 | 958 | 2797              | Likely pathogenic      | Uncertain significance |             |                                                                                                     |                                                                                                                                                                                   |  | D<br>s=0;rank=0.912     | D<br>s=1;rank=0.899     | D<br>s=0.999;rank=0.916 | D<br>s=1;rank=0.873     | M<br>s=2.51;rank=0.734  | T<br>s=2.43;rank=0.153  | D<br>s=8.03;rank=0.966  | s=0.815;rank=0.953      | T<br>s=0.819;rank=0.54  | T<br>s=0.141;rank=0.461 | s=0.466;rank=0.946      | s=5.855;rank=0.802      | s=0.998;rank=0.902 | D<br>s=0.986;rank=0.842 | s=5;rank=0.651          |                         |                   |
|-------|-------------|---------------|-----------|--------------------|-------------------------|-----|---------|-------|-----|-------------------|------------------------|------------------------|-------------|-----------------------------------------------------------------------------------------------------|-----------------------------------------------------------------------------------------------------------------------------------------------------------------------------------|--|-------------------------|-------------------------|-------------------------|-------------------------|-------------------------|-------------------------|-------------------------|-------------------------|-------------------------|-------------------------|-------------------------|-------------------------|--------------------|-------------------------|-------------------------|-------------------------|-------------------|
| TET2  | NM_00112728 | T3986C        | p.L1329P  | chr4:106182947 T>C | homoynomous SNV         | P37 | 1689.42 | 92.74 | 281 | 803               | Likely pathogenic      | Uncertain significance |             |                                                                                                     |                                                                                                                                                                                   |  | D<br>s=0;rank=0.912     | D<br>s=1;rank=0.899     | D<br>s=1;rank=0.9       | D<br>s=1;rank=0.873     | M<br>s=2.51;rank=0.734  | T<br>s=2.43;rank=0.153  | D<br>s=8.03;rank=0.966  | s=0.815;rank=0.953      | T<br>s=0.819;rank=0.54  | T<br>s=0.141;rank=0.461 | s=0.466;rank=0.946      | s=5.855;rank=0.802      | s=0.998;rank=0.902 | D<br>s=0.986;rank=0.842 | s=5;rank=0.651          |                         |                   |
| TP53  | NM_00112614 | E367_368delTG | p.V122DfX | chr17:7579321C A>  | frameshift substitution | P38 | 422.82  | 40.52 | 124 | 806               | Likely pathogenic      |                        |             |                                                                                                     |                                                                                                                                                                                   |  | D<br>s=0;rank=0.912     | D<br>s=1;rank=0.899     | D<br>s=1;rank=0.9       | D<br>s=1;rank=0.873     | M<br>s=2.51;rank=0.734  | T<br>s=2.43;rank=0.153  | D<br>s=8.03;rank=0.966  | s=0.815;rank=0.953      | T<br>s=0.819;rank=0.54  | T<br>s=0.141;rank=0.461 | s=0.466;rank=0.946      | s=5.855;rank=0.802      | s=0.998;rank=0.902 | D<br>s=0.986;rank=0.842 | s=5;rank=0.651          |                         |                   |
| TP53  | NM_00127669 | A503G         | p.H168R   | chr17:7578427T>C   | homoynomous SNV         | P5  | 679.95  | 98.25 | 112 | 114               | Likely pathogenic      | Uncertain significance | s867114783  | COSM3388210<br>COSM3388206<br>COSM3388207<br>COSM3388208<br>COSM3388211<br>COSM43545<br>COSM3388209 | 1 breast 1 pancreas<br>2 large_intestine 1 soft_tissue<br>3 ovary 1 endometrium 1 lung<br>4 haematopoietic_and_lymphoid_tissue 1 central_nervous_system<br>5 stomach 1 oesophagus |  |                         | D<br>s=0.964;rank=0.622 | D<br>s=0.781;rank=0.644 | N<br>s=0.025;rank=0.262 | D<br>s=0.979;rank=0.395 | M<br>s=3.105;rank=0.879 | D<br>s=6.8;rank=0.998   | D<br>s=7.5;rank=0.952   | D<br>s=0.216;rank=0.649 | D<br>s=1.055;rank=0.982 | D<br>s=0.984;rank=0.995 | s=0.479;rank=0.948      | s=2.461;rank=0.357 | s=0.975;rank=0.34       | D<br>s=0.968;rank=0.71  | s=0.619;rank=0.167      |                   |
| TP53  | NM_00112614 | T808A         | p.F270I   | chr17:757130A>T    | homoynomous SNV         | P8  | 168.47  | 22.22 | 96  | 162               | Likely pathogenic      | Uncertain significance |             | COSM43809<br>COSM1546805<br>COSM3937598<br>COSM43784                                                | 1 breast 1 large_intestine<br>2 oesophagus 2 lung                                                                                                                                 |  |                         | D<br>s=0.002;rank=0.784 | D<br>s=1;rank=0.899     | D<br>s=0.994;rank=0.807 | D<br>s=0;rank=0.843     | M<br>s=1;rank=0.873     | T<br>s=2.225;rank=0.632 | D<br>s=6.8;rank=0.998   | D<br>s=5.2;rank=0.837   | s=0.874;rank=0.862      | T<br>s=1.015;rank=0.974 | D<br>s=0.985;rank=0.996 | s=0.693;rank=0.975 | s=6.646;rank=0.911      | s=0.992;rank=0.535      | D<br>s=0.998;rank=0.992 | s=5.13;rank=0.696 |
| ZEB2  | NM_00117163 | C801A         | p.F267L   | chr2:145158809 G>T | homoynomous SNV         | P5  | 289.43  | 84.78 | 82  | 82                | Likely pathogenic      | Uncertain significance |             |                                                                                                     |                                                                                                                                                                                   |  | D<br>s=0.998;rank=0.715 | D<br>s=0.998;rank=0.875 | D<br>s=0;rank=0.843     | D<br>s=1;rank=0.588     | M<br>s=2.65;rank=0.778  | T<br>s=0.82;rank=0.741  | D<br>s=5.65;rank=0.87   | T<br>s=0.798;rank=0.911 | T<br>s=0.203;rank=0.776 | T<br>s=0.4;rank=0.752   | s=0.099;rank=0.772      | s=5.688;rank=0.776      | s=0.998;rank=0.918 | D<br>s=0.977;rank=0.763 | s=4.47;rank=0.536       |                         |                   |
| ZRSR2 | NM_005089   | E263delA      | p.K88RfsX | chrX:15821871A>    | frameshift deletion     | P6  | 322.22  | 75.53 | 142 | 188               | Uncertain significance | Uncertain significance |             |                                                                                                     |                                                                                                                                                                                   |  | T<br>s=0.13;rank=0.267  | B<br>s=0.047;rank=0.206 | N<br>s=0.024;rank=0.19  | D<br>s=0.043;rank=0.238 | D<br>s=0.726;rank=0.337 | N<br>s=1.795;rank=0.474 | N<br>s=2.03;rank=0.21   | N<br>s=1.78;rank=0.42   | s=0.31;rank=0.371       | T<br>s=1.064;rank=0.107 | s=0.036;rank=0.155      | s=0.006;rank=0.162      | s=2.645;rank=0.379 | s=0.933;rank=0.224      | D<br>s=0.792;rank=0.389 | s=1.22;rank=0.202       |                   |
| ZRSR2 | NM_005089   | C505T         | p.R169X   | chrX:15827389C>T   | stopgain                | P2  | 93.07   | 121   | 130 | Likely pathogenic | Likely pathogenic      |                        | COSM1716885 | 1 haematopoietic_and_lymphoid_tissue                                                                |                                                                                                                                                                                   |  |                         |                         | N<br>s=0.02;rank=0.272  | A<br>s=1;rank=0.873     |                         |                         |                         |                         |                         |                         |                         | s=12.662;rank=0.985     | s=0.998;rank=0.919 | D<br>s=0.899;rank=0.503 | s=5.46;rank=0.799       |                         |                   |
| ZRSR2 | NM_005089   | C700T         | p.Q234X   | chrX:15833942C>T   | stopgain                | P36 | 119.99  | 52.17 | 12  | 23                | Likely pathogenic      | Likely pathogenic      |             |                                                                                                     |                                                                                                                                                                                   |  |                         |                         | D<br>s=0;rank=0.843     | A<br>s=1;rank=0.873     |                         |                         |                         |                         |                         |                         |                         | s=12.985;rank=0.988     | s=0.998;rank=0.916 | D<br>s=0.906;rank=0.517 | s=5.41;rank=0.782       |                         |                   |
| ZRSR2 | NM_005089   | G751A         | p.G251R   | chrX:15833993G>A   | homoynomous SNV         | P3  | 553.87  | 94.17 | 97  | 103               | Likely pathogenic      | Uncertain significance |             |                                                                                                     |                                                                                                                                                                                   |  | D<br>s=0;rank=0.912     | D<br>s=1;rank=0.899     | D<br>s=1;rank=0.971     | D<br>s=0;rank=0.843     | H<br>s=4.1;rank=0.974   |                         | D<br>s=7.82;rank=0.96   | s=0.938;rank=0.932      | D<br>s=0.449;rank=0.898 | D<br>s=0.605;rank=0.86  | s=0.709;rank=0.976      | s=6.676;rank=0.914      | s=0.999;rank=0.996 | D<br>s=0.98;rank=0.788  | s=5.41;rank=0.782       |                         |                   |
